# Supplementary material
Source: Research Square preprint supplement (doi:10.21203/rs.3.rs-9457639/v1)
Supplement: Supplementary file 1 [file c3a264375508d77e301dfef1.docx]

HIV- and COVID-19–related stigma, fear and health-seeking barriers among pregnant and breastfeeding women in Uganda

Code book

18-4- 2026

Nodes

| Name | Description |
| --- | --- |
| **1. Social ecological Model:**  **Individual** | **All codes on Feelings of guilt, fear of judgment and infection leading to delayed care and concealment** |
| 1.1 Internalized stigma and fear |  |
| HIV shame & COVID fear |  |
| Secrecy |  |
| 1.2 Anticipated stigma |  |
| Fear of gossip |  |
| Moralized Stigma |  |
| Concealment during pregnancy |  |
| Hidden status |  |
| 1.3 Resilience |  |
| Child survival motivation |  |
| Protective motherhood |  |
| Continued adherence |  |
| Fear motivating continued ART use |  |
| Non-disclosure & care disruption |  |
| Silent care-seeking  Avoidance of disclosure even when symptomatic |  |
| **2.**  **Interpersonal** | **All codes on how Partners preventing clinic attendance due to stigma fear** |
| 2.1. Family and partner influence |  |
| Peer support |  |
| 2.2 Peer mothers & VHTs |  |
| 2.3 Emotional support |  |
| **3.**  **Community** | **All codes on** **social norms & stigma and how Community monitoring led to stigma and concealment** |
| 3.1.1 Gossip & labelling |  |
| 3.1. 2 Social surveillances |  |
| 3.1. 3 Household stigma |  |
| 3.1.4 Isolation practices |  |
| 3.1. 5. Anticipated stigma |  |
| 3.1.6 Dual fear  3.1.7 Avoidance of care |  |
| **3.2 Community mobility restrictions** | **All codes on how movement restrictions limited care** |
| 3.2.1 Lockdown fear |  |
| 3.2.2 Reduced access |  |
| 3.2.3 Visibility of service delivery |  |
| 3.2.4 Boda delivery stigma |  |
| 3.2.5 Exposure fear |  |
| 3.2.6 Discretion strategies |  |
| 3.2.7 Unmarked ART |  |
| 3.2.8 Confidentiality |  |
| 3.2.9 Social isolation |  |
| 3.2.10 Lockdown separation |  |
|  |  |
| **3.3. Layered stigma** | **All codes on how combined fears delayed care** |
| 3.3.1 HIV + COVID fear |  |
| 3.3.2 Misinformation  3.3.3 Fear of quarantine/death in hospitals |  |
| **4. Health system** | **All codes on patients disengaging from ART due to COVID fear and how ensured anonymity in service delivery** |
| **4.1.1 Service disruption** |  |
| **4.1.2** Loss to follow-up |  |
| **4.1.3** Interrupted care |  |
| **4.1.4** Confidentiality |  |
| **4.1.5** Privacy protection |  |
| **4.1.6** Trust building |  |
| **4.2 Service adaptation** |  |
| **4.2.1** ART delivery models  Discreet delivery  Home delivery  Decentralized ART distribution |  |
| **4.2.1** Provider fear |  |
| **4.2.2** Maternal care avoidance |  |
| **4.2.3** Risk management |  |
| **4.3 Health worker stigma** | **All codes on COVID-19 stigma among HCWs at the facility and family level** |
| 4.3.1 Infection fear |  |
| 4.3.2 Distanced care |  |
| **4.4 Health worker stigma mitigation** |  |
| 4.4.1Privacy systems |  |
| 4.4.2 Confidential care |  |
| **5. Policy** | **All codes on Structural privacy improvements in facilities, Support for patients and health workers, Economic and health rights for women, Radio, dialogues, testimonies, Using VHTs and peer mothers for care support and Engaging men in maternal HIV care** |
| **5.1.1 Mental health support**  Psychosocial care  Emotional wellbeing |  |
| **5.1.2 Preparedness**  Epidemic readiness  System resilience |  |
| **5.1.3 Empowerment**  Social protection  Rights-based care |  |
| **5.1.4 Community education** |  |
| Awareness campaigns |  |
| Stigma reduction |  |
| **5.1.5 Peer systems**  Community health workers  Trust networks |  |
| **5.1.6 Male involvement** |  |
| Partner engagement |  |
| Disclosure support |  |
